# Supplementary material for: Mathematical model explains differences in Omicron and Delta SARS-CoV-2 dynamics in Caco-2 and Calu-3 cells
Source: PeerJ journal article supplement (doi:10.7717/peerj.16964), 2024-03-27
Supplement: Supporting_Figures.pdf [file Supporting_Figures.pdf]

## SUPPORTING FIGURES

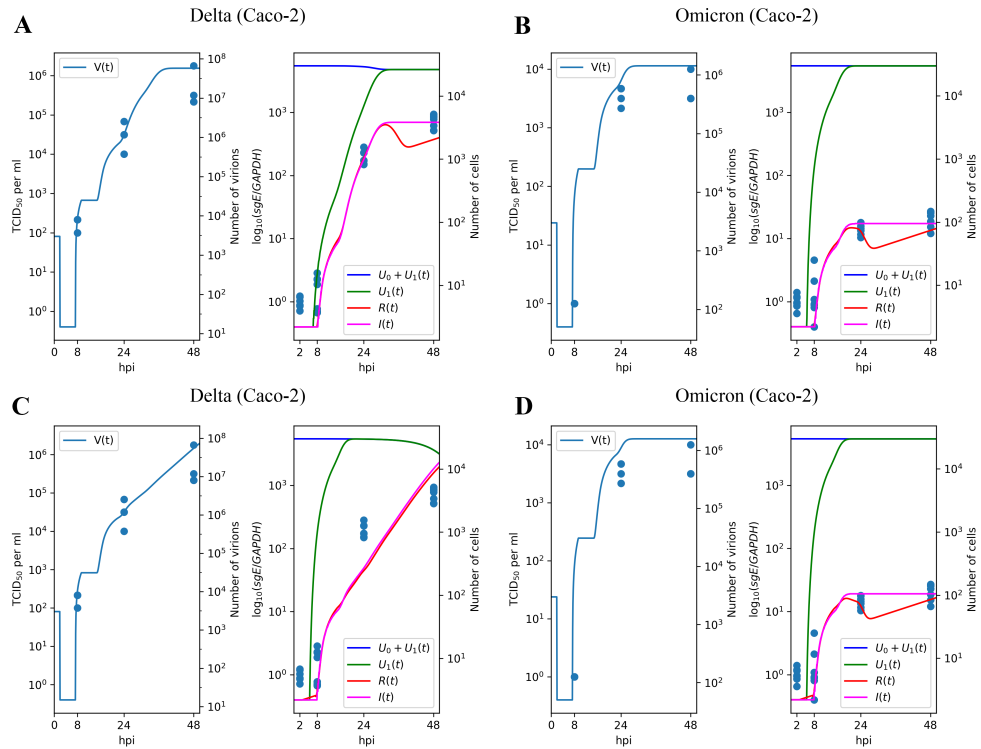

**Figure S1. Results of parameter fitting for Caco-2 cell line.** The top row shows the results for Delta (A) and Omicron (B) variants with a single variant-specific parameter (the cytokine generation rate  $p_c$ ). The bottom row shows the results for Delta (C) and Omicron (D) variants with a single variant-specific parameter (the infectivity reduction rate  $k$ ). The left parts of panels (A), (B), (C), and (D) show TCID<sub>50</sub> assay values (infectious virus titers); the right parts show RT-qPCR results for subgenomic envelope viral RNA (*sgE*), normalized by the human housekeeping gene *GAPDH*. The following parameter values were inferred for the top row:  $\beta = 9.23736 \cdot 10^{-9}$ ,  $k = 3.46004 \cdot 10^7$ ,  $p_c = 12389.2$  (Delta),  $p_c = 573035$  (Omicron). The following parameter values were inferred for the bottom row:  $\beta = 1.14462 \cdot 10^{-8}$ ,  $k = 10.001$  (Delta),  $k = 1 \cdot 10^9$  (Omicron),  $p_c = 626586$ .

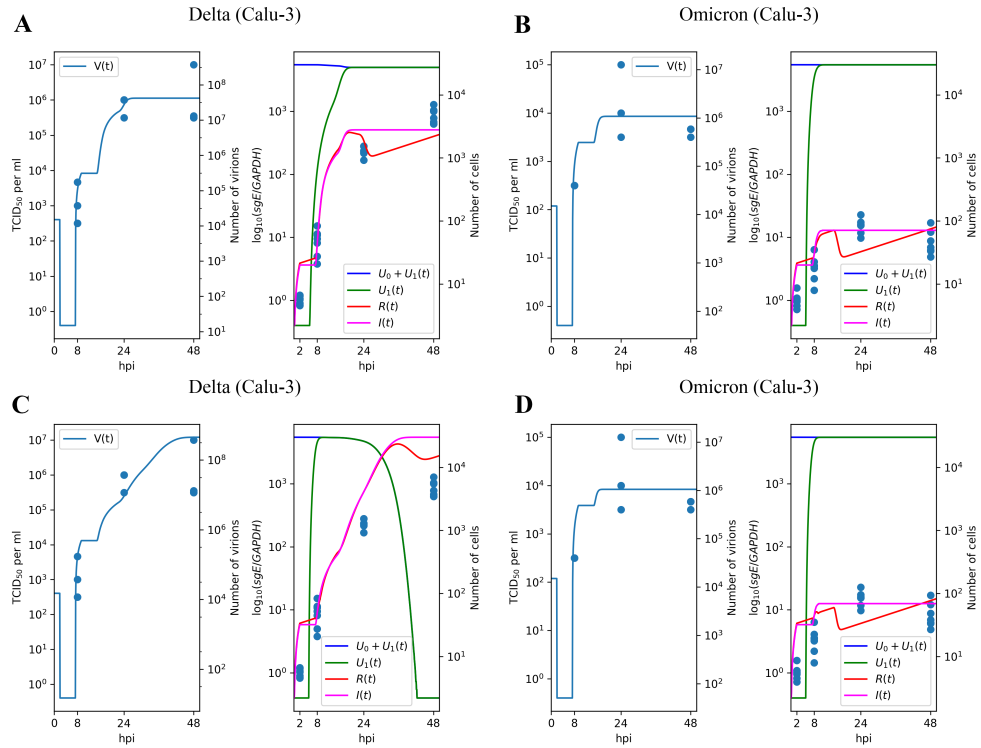

**Figure S2. Results of parameter fitting for Calu-3 cell line.** The top row shows the results for Delta (A) and Omicron (B) variants with a single variant-specific parameter (the cytokine generation rate  $p_c$ ). The bottom row shows the results for Delta (C) and Omicron (D) variants with a single variant-specific parameter (the infectivity reduction rate  $k$ ). The left parts of panels (A), (B), (C), and (D) show TCID<sub>50</sub> assay values (infectious virus titers); the right parts show RT-qPCR results for subgenomic envelope viral RNA (*sgE*), normalized by the human housekeeping gene *GAPDH*. The following parameter values were inferred for the top row:  $\beta = 2.29588 \cdot 10^{-8}$ ,  $k = 9.48894 \cdot 10^8$ ,  $p_c = 40612.4$  (Delta),  $p_c = 1.86387 \cdot 10^6$  (Omicron). The following parameter values were inferred for the bottom row:  $\beta = 3.61456 \cdot 10^{-8}$ ,  $k = 10.0223$  (Delta),  $k = 1 \cdot 10^9$  (Omicron),  $p_c = 2.12825 \cdot 10^6$ .
